# Supplementary material for: Determinants of Change in Physical Activity in Children and Adolescents: A Systematic Review
Source: PubMed Central journal article supplement (PMC3100507; doi:10.1016/j.amepre.2011.02.025), 2011-06
Supplement: mmc1.pdf [file mmc1.pdf]

# Determinants of Change in Physical Activity in Children and Adolescents

## A Systematic Review

Christopher Craggs, Msc, Kirsten Corder, PhD, Esther M.F. van Sluijs, PhD, Simon J. Griffin, DM

---

### Appendix A

#### Criteria used to assess study quality of all studies included in the review.

|   |                                                                                                                                                                                                                                                                                                                                                                                                                                                                     |
|---|---------------------------------------------------------------------------------------------------------------------------------------------------------------------------------------------------------------------------------------------------------------------------------------------------------------------------------------------------------------------------------------------------------------------------------------------------------------------|
| A | <p>Adequate description of study population<br/>Adequate reporting of baseline and follow-up participant characteristics, and physical activity at baseline and follow-up</p> <p>(Positive if information on baseline characteristics—level and/or distribution—of the exposure variables included in the analyses were provided, if the study setting was reported, and if levels of physical activity were reported for all strata at baseline and follow-up)</p> |
| B | <p>Adequate follow-up and information on representativeness of the study sample at baseline and follow-up, including information on potential systematic dropout</p> <p>(Positive if follow-up rates were documented and if information on characteristics of responders and nonresponders at baseline at follow-up were presented and potential differences statistically tested)</p>                                                                              |
| C | <p>Validated measure of physical activity and adequate physical activity measurement</p> <p>(Positive if the same measure of physical activity was employed at both baseline and follow-up and if this method of measuring physical activity was validated and reported/referred to in the relevant age groups at both baseline age and follow-up age)</p>                                                                                                          |
| D | <p>Validated measurement of exposure variables</p> <p>(Positive if standardized questionnaires and/or validated measures were used to assess exposure variables and were reported/referred to)</p>                                                                                                                                                                                                                                                                  |
| E | <p>Potential confounders and sources of bias considered in analyses</p> <p>(Positive if statistical analyses have been adjusted for known or potential confounders; for instance, if multilevel modeling was employed to account for potential clustering at group level)</p>                                                                                                                                                                                       |

Scoring:  
 Positive  
 Negative  
 Not described or insufficient information provided

## Appendix B

### Summary characteristics of the studies included in the systematic review

| Study                             | Country   | Study characteristics:<br>age (years); n (% girls); setting      | Period of<br>change<br>(years);<br>(# of<br>measure-<br>ments) | Physical activity<br>measurement | Modeling of<br>change                 | Change<br>measured                              | Investigated exposures                                                                                                                                                                     |
|-----------------------------------|-----------|------------------------------------------------------------------|----------------------------------------------------------------|----------------------------------|---------------------------------------|-------------------------------------------------|--------------------------------------------------------------------------------------------------------------------------------------------------------------------------------------------|
| Alderman<br>(2010) <sup>1</sup>   | U.S.      | 5.3 (SD 0.2); 96; university-based<br>preschool movement program | 1–9                                                            | Self-report                      | Difference<br>testing                 | Change in<br>physical activity                  | Gender                                                                                                                                                                                     |
| Anderson<br>(1986) <sup>2</sup>   | U.S.      | 10–12; 238;<br>School district in Iowa                           | 5 (2)                                                          | Self-report (1-year<br>recall)   | Regression<br>model                   | Change in sports<br>participation               | Gender, previous physical<br>activity, satisfaction, reward                                                                                                                                |
| Armstrong<br>(2000) <sup>3</sup>  | UK        | 11.1 (0.4); 202 (48); 15 state schools<br>in Exeter, UK          | 2 (3)                                                          | Heart rate<br>monitoring         | Multilevel<br>regression<br>model     | Change in MVPA                                  | Gender,<br>BMI/anthropometry,<br>developmental stage, age                                                                                                                                  |
| Ball<br>(2009) <sup>4</sup>       | Australia | 5–6 and 10–12; 1215 (53); 19 public<br>elementary schools        | 3 (2)                                                          | Accelerometry                    | Linear<br>regression<br>model         | Change in<br>physical activity,<br>MPA, VPA     | Gender, SES                                                                                                                                                                                |
| Barnett<br>(2002) <sup>5</sup>    | Canada    | 9–11; 2318; 16 schools in Montreal,<br>Canada                    | 2 (3)                                                          | Self-report<br>(7-day recall)    | Multilevel<br>regression<br>model     | Decline to less<br>than one activity<br>per day | Age, grade, BMI, ethnicity,<br>smoking status, sedentary<br>behavior, previous physical<br>activity, region, SES, self-<br>efficacy, parental/family<br>support, parental role<br>modeling |
| Bauer<br>(2008) <sup>6</sup>      | U.S.      | 12.8 (SD 0.8); 5287; 31 middle and<br>high schools in Minnesota  | 5 (2)                                                          | Self-report<br>(7 day recall).   | Regression<br>model                   | Change in MVPA                                  | SES, ethnicity,<br>parental/family support,<br>parental attitudes toward<br>physical activity                                                                                              |
| Brodersen<br>(2007) <sup>7</sup>  | UK        | 11–12; 474; 36 randomly selected<br>schools in London, UK        | 4 (5)                                                          | Self-report<br>(7-day recall)    | Multilevel<br>regression<br>model     | Change in<br>average days<br>spent in VPA       | Gender, ethnicity, SES                                                                                                                                                                     |
| Bruner<br>(2009) <sup>8</sup>     | Canada    | 15.3 (SD 1.3); 40; mid-size public<br>school                     | 8 months (5)                                                   | Accelerometry                    | Generalized<br>estimating<br>equation | Change in<br>physical activity                  | Gender, grade, VPA                                                                                                                                                                         |
| Butcher<br>(2001) <sup>9</sup>    | U.S.      | 9.1; 705 (100); seven elementary<br>schools                      | 1 (2)                                                          | Self-report                      | Regression<br>model                   | Change in sports<br>participation               | Perceived competence,<br>parental/family support                                                                                                                                           |
| Callaghan<br>(2010) <sup>10</sup> | Hong Kong | 16; 1055; public secondary schools                               | 5 (20)                                                         | Self-report                      | Multivariate<br>ANOVA                 | Change in<br>exercise behavior                  | Self-efficacy, social<br>liberation                                                                                                                                                        |

| <b>Study</b>                     | <b>Country</b> | <b>Study characteristics:<br/>age (years); n (% girls); setting</b>                       | <b>Period of<br/>change<br/>(years);<br/>(# of<br/>measure-<br/>ments)</b> | <b>Physical activity<br/>measurement</b>                           | <b>Modeling of<br/>change</b>       | <b>Change<br/>measured</b>              | <b>Investigated exposures</b>                                                                                                                                                                                                                                                                                       |
|----------------------------------|----------------|-------------------------------------------------------------------------------------------|----------------------------------------------------------------------------|--------------------------------------------------------------------|-------------------------------------|-----------------------------------------|---------------------------------------------------------------------------------------------------------------------------------------------------------------------------------------------------------------------------------------------------------------------------------------------------------------------|
| Carver<br>(2009) <sup>11</sup>   | Australia      | 5–6 and 10–12; 1215 (53); 19 public elementary schools                                    | 3 (2)                                                                      | Accelerometry                                                      | Linear regression model             | Change in MVPA                          | Age, gender, road traffic, physical activity infrastructure, road length, intersection density, number of speed bumps, number of traffic lights, local road index                                                                                                                                                   |
| Corder<br>(2010) <sup>12</sup>   | UK             | 10.2 (SD 0.3); 884 (58); 92 primary schools in Norfolk, UK                                | 1 (2)                                                                      | Accelerometry                                                      | Multilevel linear regression models | Change in total physical activity, MVPA | Baseline physical activity, gender, SES, body fat %, Index of Multiple Deprivation                                                                                                                                                                                                                                  |
| Crawford<br>(2010) <sup>13</sup> | Australia      | 5–6 and 10–12; 1215 (53); 19 public elementary schools                                    | 3 (2)                                                                      | Accelerometry                                                      | Linear regression model             | Change in MVPA                          | BMI, SES, road traffic, number of siblings, sibling physical activity, parental role modeling, number of rules for physical activity and sedentary behavior, parental marital status, parental support, parental physical activity participation, physical activity infrastructure, distance to school, road length |
| Crocker<br>(2003) <sup>14</sup>  | Canada         | 15–16; 178 (100); city and town (32%) high schools in Saskatoon, Canada                   | 1 (2)                                                                      | PAQ-A (7-day recall)                                               | Regression model                    | Change in physical activity             | BMI, physical perception, self-worth, satisfaction, self-esteem, dietary habits                                                                                                                                                                                                                                     |
| Davison<br>(2007) <sup>15</sup>  | U.S.           | 11.3 (SD 0.3); 221 (60); 10-year longitudinal study in five-county radius in Pennsylvania | 2 (2)                                                                      | Self-report (Children's Physical Activity Scale) and accelerometry | Structural equation model           | Change in MVPA                          | Developmental stage, perceived competence, physical perception, depressive symptoms, maturity fears                                                                                                                                                                                                                 |

| <b>Study</b>                   | <b>Country</b> | <b>Study characteristics:<br/>age (years); n (% girls); setting</b>                                           | <b>Period of<br/>change<br/>(years);<br/>(# of<br/>measure-<br/>ments)</b> | <b>Physical activity<br/>measurement</b> | <b>Modeling of<br/>change</b> | <b>Change<br/>measured</b>                 | <b>Investigated exposures</b>                                                                                                                                                                                                                                                                    |
|--------------------------------|----------------|---------------------------------------------------------------------------------------------------------------|----------------------------------------------------------------------------|------------------------------------------|-------------------------------|--------------------------------------------|--------------------------------------------------------------------------------------------------------------------------------------------------------------------------------------------------------------------------------------------------------------------------------------------------|
| de Bruijn (2006) <sup>16</sup> | Netherlands    | 15.1 (SD 1.9); 221 (60); 23 general practitioners from nine family practice centers in Eindhoven, Netherlands | 4 months (2) [May–November]                                                | Self-report                              | Structural equation model     | Change in physical activity                | Previous physical activity, physical activity attitude, perceived behavioral control, intention, social subjective norm, availability of physical activity infrastructure, neighborhood safety, aesthetics in the environment                                                                    |
| DiLorenzo (1998) <sup>17</sup> | U.S.           | 11.2 (SD 0.7); 242 (50); two randomly selected community schools                                              | 3 (2)                                                                      | Self-report (physical activity)          | Regression model              | Change in daily MET tasks                  | Self-efficacy, enjoyment of physical activity, exercise knowledge, interest in sports media, sedentary behavior, parental/family support, parental role modeling, parental self-efficacy, peer social support, parental physical activity, barriers, availability of physical activity equipment |
| Dishman (2006) <sup>18</sup>   | U.S.           | 14.1 (SD 0.6); 1037 (100); 22 public high schools in South Carolina                                           | 3 (2)                                                                      | 3DPAR (3-day recall)                     | Structural equation model     | Change in 3-day MET tasks                  | Ethnicity, physical activity attitude, satisfaction, social subjective norm, perceived behavioral control, self-efficacy, goal setting                                                                                                                                                           |
| Dishman (2009) <sup>19</sup>   | U.S.           | 14.1 (SD 0.6); 1037 (100); 22 public high schools in South Carolina                                           | 3 (2)                                                                      | 3DPAR (3-day recall)                     | Structural equation model     | Change in physical activity                | Self-efficacy, social support                                                                                                                                                                                                                                                                    |
| Dovey (1998) <sup>20</sup>     | New Zealand    | 15; 421 (100); cohort of live births at a Dunedin hospital, New Zealand                                       | 3 (2)                                                                      | Self-report (1 year recall, by month)    | Repeated measures ANOVA       | Decline in time spent in physical activity | Gender                                                                                                                                                                                                                                                                                           |
| Dowda (2007) <sup>21</sup>     | U.S.           | 13.6 (SD 0.6); 421 (100); 24 high schools in South Carolina                                                   | 5 (3)                                                                      | 3DPAR                                    | Growth curve model            | Change in MET tasks                        | Ethnicity, SES, physical activity attitude, parental/family support, self-efficacy, availability of sports equipment                                                                                                                                                                             |

| <b>Study</b>                      | <b>Country</b> | <b>Study characteristics:<br/>age (years); n (% girls); setting</b>                             | <b>Period of<br/>change<br/>(years);<br/>(# of<br/>measure-<br/>ments)</b> | <b>Physical activity<br/>measurement</b>                                                 | <b>Modeling of<br/>change</b>   | <b>Change<br/>measured</b>                                    | <b>Investigated exposures</b>                                                                                                                                                    |
|-----------------------------------|----------------|-------------------------------------------------------------------------------------------------|----------------------------------------------------------------------------|------------------------------------------------------------------------------------------|---------------------------------|---------------------------------------------------------------|----------------------------------------------------------------------------------------------------------------------------------------------------------------------------------|
| Duncan (2007) <sup>22</sup>       | U.S.           | 12.1 (SD 1.63); 371 (50.1); 58 neighborhoods in the Pacific North West                          | 3 (4)                                                                      | Three self-report items (two taken from Youth Risk Behavior Survey - YRBS) and pedometer | Latent growth curve model       | Change in physical activity                                   | BMI, developmental stage, SES, ethnicity, self-efficacy, peer social support, peer physical activity                                                                             |
| Dzewaltowski (2007) <sup>23</sup> | U.S.           | 12.4; 629 (53); 16 middle schools in Kansas                                                     | 2 (3)                                                                      | 3DPAR                                                                                    | Latent growth curve model       | Change in MVPA                                                | Self-efficacy                                                                                                                                                                    |
| Findlay (2009) <sup>24</sup>      | Canada         | 4–11; 8817 (51); national longitudinal survey                                                   | 7 (7)                                                                      | Self-report                                                                              | Group based trajectory modeling | Change in physical activity                                   | SES, parental marital status, urban–rural status                                                                                                                                 |
| Fuchs (1988) <sup>25</sup>        | West Germany   | 13.3 (SD 0.9); 932 (46); 22 schools in Berlin and Bremen, Germany                               | 2 (3)                                                                      | 1-year physical activity recall                                                          | Wilcoxon test for trend         | Change in total physical activity, MVPA, and VPA              | Gender, SES                                                                                                                                                                      |
| Garcia (1998) <sup>26</sup>       | U.S.           | 10–12; 132 (58); junior high schools                                                            | 1 (2)                                                                      | 7-day recall (CAAL-Child/Adolescent Activity Log)                                        | Structural equation model       | Change in physical activity                                   | Gender, ethnicity, physical activity attitude                                                                                                                                    |
| Goran (1998) <sup>27</sup>        | U.S.           | 5.5 (girls, SD 0.9); 5.3 (boys, SD 0.9); 22 (50); cohort in Burlington, VT                      | 5 (3)                                                                      | Doubly labeled water over 14 days                                                        | ANOVA                           | Change in total energy expenditure, AEE, activity (hours/day) | Gender                                                                                                                                                                           |
| Hampson (2007) <sup>28</sup>      | U.S.           | 9.5; 846 (50); 15 elementary schools in one school district in Oregon                           | 7 (5)                                                                      | Self-report                                                                              | Latent growth curve model       | Change in athleticism                                         | Age, gender, BMI, physical activity attitude                                                                                                                                     |
| Kahn (2008) <sup>29</sup>         | U.S.           | 10–16; 12,812 (57); children from 50 states in the U.S., offspring from the Nurses Health Study | 2 (3)                                                                      | 1-year physical recall                                                                   | Mixed regression model          | Change in MVPA                                                | Age, gender, BMI, self-esteem, value of health and appearance, peer attitudes, parental attitudes to physical activity, parental physical activity, social group subjective norm |
| Knowles 2009) <sup>30</sup>       | UK             | 11.8 (0.4); 204; 17 primary schools and six secondary schools in Edinburgh, UK                  | 1 (2)                                                                      | PAQ-C (7-day recall)                                                                     | Linear regression               | Change in physical activity                                   | Developmental stage, physical self-perceptions                                                                                                                                   |
| McMurray (2008) <sup>31</sup>     | U.S.           | 10; 765 (49); 21 elementary schools and 16 high schools in North Carolina                       | 5 (2)                                                                      | Self-report (7-day recall)                                                               | ANOVA                           | Decline in total physical activity, MPA and VPA               | Gender, BMI, ethnicity, region, developmental stage, SES                                                                                                                         |

| <b>Study</b>                          | <b>Country</b> | <b>Study characteristics:<br/>age (years); n (% girls); setting</b>                                      | <b>Period of<br/>change<br/>(years);<br/>(# of<br/>measure-<br/>ments)</b> | <b>Physical activity<br/>measurement</b>                    | <b>Modeling of<br/>change</b> | <b>Change<br/>measured</b>                  | <b>Investigated exposures</b>                                                                                                                                                                                                                                               |
|---------------------------------------|----------------|----------------------------------------------------------------------------------------------------------|----------------------------------------------------------------------------|-------------------------------------------------------------|-------------------------------|---------------------------------------------|-----------------------------------------------------------------------------------------------------------------------------------------------------------------------------------------------------------------------------------------------------------------------------|
| Morgan (2008) <sup>32</sup>           | U.S.           | 6–12; 257; two public elementary schools, U.S.                                                           | 27 months (2)                                                              | Pedometers (4 days—elementary students; 8 days—junior high) | Regression model              | Change in steps taken                       | Age, gender, BMI, perceived competence, physical self-perception                                                                                                                                                                                                            |
| Motl (2004) <sup>33</sup>             | U.S.           | 12.7 (SD 0.4); 3878 (49); 16 schools in Minneapolis, MN                                                  | 2 (3)                                                                      | Self-report                                                 | Latent growth curve model     | Change in physical activity                 | Gender, depressive symptoms, alcohol consumption, smoking status                                                                                                                                                                                                            |
| Motl (2005) <sup>34</sup>             | U.S.           | 13.6 (SD 0.6); 856 (100); 24 high schools in South Carolina                                              | 1 (2)                                                                      | 3DPAR                                                       | Structural equation model     | Change in physical activity, MPA and VPA    | Ethnicity, self-efficacy, perceived behavioral control                                                                                                                                                                                                                      |
| Motl (2006) <sup>35</sup>             | U.S.           | 12.7 (SD 0.4); 3878 (49); 16 schools in Minneapolis, MN                                                  | 2 (3)                                                                      | Self-report                                                 | Latent growth curve model     | Change in physical activity                 | Gender, grade, value of health and appearance, sedentary behavior, smoking status                                                                                                                                                                                           |
| Nader (2008) <sup>36</sup>            | U.S.           | 9.0 (SD 0.03); 771 (51); recruitment at community hospitals at 10 university data collection sites, U.S. | 6 (4)                                                                      | Accelerometry                                               | Growth curve model            | Change in weekday physical activity         | Gender, BMI, SES, ethnicity, region                                                                                                                                                                                                                                         |
| Neumark-Sztainer (2003) <sup>37</sup> | U.S.           | 15.4 (SD 1.1); 201 (100); six high schools (three control schools) in the Minneapolis/St. Paul, MN area  | 1 (3)                                                                      | Self-report (7-day recall)                                  | Regression model              | Change in MVPA, MPA, and VPA                | Self-acceptance, satisfaction, barriers, sedentary behavior, physical perception, depressive symptoms, perceived competence, self-efficacy, enjoyment of physical activity, benefits of physical activity, parental attitudes to physical activity, parental marital status |
| Raudsepp (2008) <sup>38</sup>         | Estonia        | 12.6 (SD 0.5); 193 (100); four high schools in Tartu, Estonia                                            | 1.75 (4)                                                                   | 3DPAR                                                       | Latent growth curve model     | Combined change in MET tasks, MVPA, and VPA | BMI, peer social support                                                                                                                                                                                                                                                    |
| Raudsepp (2008) <sup>39</sup>         | Estonia        | 12.3 (SD 0.4); 345 (50); four high schools in Tartu, Estonia                                             | 1.75 (4)                                                                   | 3DPAR                                                       | Latent growth curve model     | Change in MET tasks, MVPA, and VPA          | Sedentary behavior                                                                                                                                                                                                                                                          |
| Rhodes (2006) <sup>40</sup>           | Canada         | 11.2 (SD 0.6); 364 (51); 10 schools in British Columbia, Canada                                          | 1 (2)                                                                      | Self-report                                                 | Structural equation model     | Change in physical activity                 | Intention, perceived behavioral control                                                                                                                                                                                                                                     |

| <b>Study</b>                  | <b>Country</b> | <b>Study characteristics:<br/>age (years); n (% girls); setting</b>                                                                          | <b>Period of<br/>change<br/>(years);<br/>(# of<br/>measure-<br/>ments)</b> | <b>Physical activity<br/>measurement</b>                        | <b>Modeling of<br/>change</b>         | <b>Change<br/>measured</b>        | <b>Investigated exposures</b>                                                                                                                                                                                                                                                                                           |
|-------------------------------|----------------|----------------------------------------------------------------------------------------------------------------------------------------------|----------------------------------------------------------------------------|-----------------------------------------------------------------|---------------------------------------|-----------------------------------|-------------------------------------------------------------------------------------------------------------------------------------------------------------------------------------------------------------------------------------------------------------------------------------------------------------------------|
| Robinson (1993) <sup>41</sup> | U.S.           | 12.4 (SD 0.7); 674 (100); four middle schools in northern California                                                                         | 1 (3)                                                                      | Self-report                                                     | Regression model                      | Change in physical activity       | Sedentary behavior                                                                                                                                                                                                                                                                                                      |
| Sagatun (2008) <sup>42</sup>  | Norway         | 15–16; 2489 (55%); 32 secondary schools in Oslo                                                                                              | 3 (2)                                                                      | Accelerometry and self-report                                   | ANOVA and linear regression model     | Change in leisure time activity   | Ethnicity, SES                                                                                                                                                                                                                                                                                                          |
| Sallis (1999) <sup>43</sup>   | U.S.           | 9.5 (SD 0.6); 732 (51); seven suburban public schools in San Diego                                                                           | 20 months (2)                                                              | Accelerometer measurement, child self-report, and parent report | Regression model                      | Change in physical activity index | BMI, anthropometry, SES, ethnicity, preference for physical activity, perceived competence, physical perception, self-worth, self-acceptance, physical activity attitude, PE attitude, Intention, sedentary behavior, parental/family support, parental physical activity, parental marital status, neighborhood safety |
| Sigmund (2009) <sup>44</sup>  | Czech Republic | 5–7; 208; 11 kindergarten schools in Marovia                                                                                                 | 1 (2)                                                                      | Accelerometry and self-report                                   | ANOVA                                 | Change in AEE                     | Days of the week                                                                                                                                                                                                                                                                                                        |
| Spadano (2005) <sup>45</sup>  | U.S.           | 9.9 (SD 0.4); 28 (100); recruitment in Cambridge, MA and Somerville, MA public schools and Massachusetts Institute of Technology summer camp | 5 (3)                                                                      | Doubly labeled water and indirect calorimetry                   | Mixed-model repeated measure analyses | Change in AEE                     | BMI/anthropometry, ethnicity, developmental stage, parental weight status                                                                                                                                                                                                                                               |
| Viira (2003) <sup>46</sup>    | Estonia        | 13.1 (boys, SD 0.2); 13.0 (girls, SD 0.4); 197 (53); middle and high schools in Estonia                                                      | 1 (2)                                                                      | Self-report (7-day recall)                                      | Regression model                      | Change in MVPA                    | Peer attitudes, enjoyment of physical activity, physical perception, barriers, parental physical activity                                                                                                                                                                                                               |

If the mean age of the sample was not reported, the reported age group or age range was included.

AEE, activity energy expenditure; MPA, moderate physical activity; MVPA, moderate-to-vigorous physical activity; N/A, data were not reported; PAQ, physical activity questionnaire; PE, physical education; VPA, vigorous physical activity; 3DPAR, 3-day physical activity recall

## References for Appendix B

1. Alderman BL, Benham-Deal TB, Jenkins JM. Change in parental influence on children's physical activity over time. *J Phys Act Health* 2010;7(1):60–7.
2. Anderson DF, Lorenz FO, Pease DG. Prediction of present participation from children's gender, past participation, and attitudes: a longitudinal analysis. *Sociol Sport J* 1986;3(2):101–11.
3. Armstrong N, Welsman JR, Kirby BJ. Longitudinal changes in 11–13-year-olds' physical activity. *Acta Paediatr* 2000;89(7):775–80.
4. Ball K, Cleland VJ, Timperio AF, Salmon J, Crawford DA. Socioeconomic position and children's physical activity and sedentary behaviors: longitudinal findings from the CLAN study. *J Phys Act Health* 2009;6(3):289–98.
5. Barnett TA, O'Loughlin J, Paradis G. One- and two-year predictors of decline in physical activity among inner-city schoolchildren. *Am J Prev Med* 2002;23(2):121–8.
6. Bauer KW, Nelson MC, Boutelle KN, Neumark-Sztainer D. Parental influences on adolescents' physical activity and sedentary behavior: longitudinal findings from Project EAT-II. *Int J Behav Nutr Phys Act* 2008;5.
7. Brodersen NH, Steptoe A, Boniface DR, Wardle J. Trends in physical activity and sedentary behaviour in adolescence: ethnic and socioeconomic differences. *Br J Sports Med* 2007;41(3):140–4.
8. Bruner MW, Chad KE, Beattie-Flath JA, et al. Examination of physical activity in adolescents over the school year. *Pediatr Exerc Sci* 2009;21(4):421–35.
9. Butcher J, Sallis JF, McKenzie TL, Alcaraz JE. A longitudinal study of children's participation in organized sport and instructional programs. *AVANTE* 2001;7(1):86–96.
10. Callaghan P, Khalil E, Morres I. A prospective evaluation of the Transtheoretical Model of Change applied to exercise in young people. *Int J Nurs Stud* 2010;47(1):3–12.
11. Carver A, Timperio A, Hesketh K, Crawford D. Are safety-related features of the road environment associated with smaller declines in physical activity among youth? *J Urban Health* 2009;87(1):29–43.
12. Corder K, van Sluijs EM, Ekelund U, Jones AP, Griffin SJ. Changes in children's physical activity over 12 months: longitudinal results from the SPEEDY study. *Pediatrics* 2010;126(4):e926–35.
13. Crawford D, Cleland V, Timperio A, et al. The longitudinal influence of home and neighbourhood environments on children's body mass index and physical activity over 5 years: the CLAN study. *Int J Obes* 2010;34(7):1177–87.
14. Crocker P, Sabiston C, Forrester S, Kowalski N, Kowalski K, McDonough M. Predicting change in physical activity, dietary restraint, and physique anxiety in adolescent girls: examining covariance in physical self-perceptions. *Can J Public Health* 2003;94(5):332–7.
15. Davison KK, Werder JL, Trost SG, Baker BL, Birch LL. Why are early maturing girls less active? Links between pubertal development, psychological well-being, and physical activity among girls at ages 11 and 13. *Soc Sci Med* 2007;64(12):2391–404.
16. de Bruijn GJ, Kremers SPJ, Lensvelt-Mulders G, de Vries H, van Mechelen W, Brug J. Modeling individual and physical environmental factors with adolescent physical activity. *Am J Prev Med* 2006;30(6):507–12.
17. DiLorenzo TM, Stucky-Ropp RC, Vander Wal JS, Gotham HJ. Determinants of exercise among children. II. A longitudinal analysis. *Prev Med* 1998;27(3):470–7.



18. Dishman RK, Saunders RP, Felton G, Ward DS, Dowda M, Pate RR. Goals and intentions mediate efficacy beliefs and declining physical activity in high school girls. *Am J Prev Med* 2006;31(6):475–83.
19. Dishman RK, Saunders RP, Motl RW, Dowda M, Pate RR. Self-efficacy moderates the relation between declines in physical activity and perceived social support in high school girls. *J Pediatr Psychol* 2009;34(4):441–51.
20. Dovey SM. Continuity and change in sporting and leisure time physical activities during adolescence. *Br J Sports Med* 1998;32(1):53–57.
21. Dowda M, Dishman RK, Pfeiffer KA, Pate RR. Family support for physical activity in girls from 8th to 12th grade in South Carolina. *Prev Med* 2007;44(2):153–9.
22. Duncan SC, Duncan TE, Strycker LA, Chaumeton NR. A cohort-sequential latent growth model of physical activity from ages 12 to 17 years. *Ann Behav Med* 2007;33(1):80–9.
23. Dzewaltowski DA, Karteroliotis K, Welk G, Johnston JA, Nyaronga D, Estabrooks PA. Measurement of self-efficacy and proxy efficacy for middle school youth physical activity. *J Sport Exerc Psychol* 2007;29(3):310–32.
24. Findlay LC, Garner RE, Kohen DE. Children’s organized physical activity patterns from childhood into adolescence. *J Phys Act Health* 2009;6(6):708–15.
25. Fuchs R, Powell KE, Semmer NK, Dwyer JH, Lippert P, Hoffmeister H. Patterns of physical activity among German adolescents: the Berlin-Bremen Study. *Prev Med* 1988;17(6):746–63.
26. Garcia AW, Pender NJ, Antonakos CL, Ronis DL. Changes in physical activity beliefs and behaviors of boys and girls across the transition to junior high school. *J Adolesc Health* 1998;22(5):394–402.
27. Goran MI, Gover BA, Nagy TR, Johnson RK. Developmental changes in energy expenditure and physical activity in children: evidence for a decline in physical activity in girls before puberty. *Pediatrics* 1998;101(5):887–91.
28. Hampson SE, Andrews JA, Peterson M, Duncan SC. A cognitive-behavioral mechanism leading to adolescent obesity: children’s social images and physical activity. *Ann Behav Med* 2007;34(3):287–94.
29. Kahn JA, Huang B, Gillman MW, et al. Patterns and determinants of physical activity in U.S. adolescents. *J Adolesc Health* 2008;42(4):369–77.
30. Knowles A-M, Niven AG, Fawkner SG, Henretty JM. A longitudinal examination of the influence of maturation on physical self-perceptions and the relationship with physical activity in early adolescent girls. *J Adolesc* 2009;32(3):555–66.
31. McMurray RG, Harrell JS, Creighton D, Wang Z, Bangdiwala SI. Influence of physical activity on change in weight status as children become adolescents. *Int J Pediatr Obes* 2008;3(2):69–77.
32. Morgan CF, Graser SV, Pan Grazi RP. A prospective study of pedometer-determined physical activity and physical self-perceptions in children. *Res Q Exerc Sport* 2008;79(2):133–40.
33. Motl RW, Birnbaum AS, Kubik MY, Dishman RK. Naturally occurring changes in physical activity are inversely related to depressive symptoms during early adolescence. *Psychosom Med* 2004;66(3):336–42.
34. Motl RW, Dishman RK, Ward DS, et al. Comparison of barriers to self-efficacy and perceived behavioral control for explaining physical activity across 1 year among adolescent girls. *Health Psychol* 2005;24(1):106–11.
35. Motl RW, McAuley E, Birnbaum AS, Lytle LA. Naturally occurring changes in time spent watching television are inversely related to frequency of physical activity during early adolescence. *J Adolesc* 2006;29(1):19–32.

36. Nader PR, Bradley RH, Houts RM, McRitchie SL, O'Brien M. Moderate-to-vigorous physical activity from ages 9 to 15 years. *JAMA* 2008;300(3):295–305.
37. Neumark-Sztainer D, Story M, Hannan PJ, Tharp T, Rex J. Factors associated with changes in physical activity: a cohort study of inactive adolescent girls. *Arch Pediatr Adolesc Med* 2003;157(8):803–10.
38. Raudsepp L, Neissaar I, Kull M. Longitudinal stability of sedentary behaviors and physical activity during early adolescence. *Pediatr Exerc Sci* 2008;20(3):251–62.
39. Raudsepp L, Viira R. Changes in physical activity in adolescent girls: a latent growth modelling approach. *Acta Paediatr* 2008;97(5):647–52.
40. Rhodes RE, Macdonald HM, McKay HA. Predicting physical activity intention and behavior among children in a longitudinal sample. *Soc Sci Med* 2006;62(12):3146–56.
41. Robinson TN, Hammer LD, Killen JD, et al. Does television viewing increase obesity and reduce physical activity? Cross-sectional and longitudinal analyses among adolescent girls. *Pediatrics* 1993;91(2):273–80.
42. Sagatun A, Kolle E, Anderssen SA, Thoresen M, Sogaard AJ. Three-year follow-up of physical activity in Norwegian youth from two ethnic groups: associations with socio-demographic factors. *BMC Public Health* 2008;8:419.
43. Sallis JF, Alcaraz JE, McKenzie TL, Hovell MF. Predictors of change in children's physical activity over 20 months. Variations by gender and level of adiposity. *Am J Prev Med* 1999;16(3):222–9.
44. Sigmund E, Sigmundovaj D, El Ansari W. Changes in physical activity in pre-schoolers and first-grade children: longitudinal study in the Czech Republic. *Child Care Health Dev* 2009;35(3):376–82.
45. Spadano JL, Bandini LG, Must A, Dallal GE, Dietz WH. Longitudinal changes in energy expenditure in girls from late childhood through midadolescence. *Am J Clin Nutr* 2005;81(5):1102–9.
46. Viira R, Raudsepp L. Psychosocial correlates of physical activity among seventh through eighth grades. *J Hum Mov Stud* 2003;44(6):501–17
